# Supplementary material for: Catalytic water oxidation by an in situ generated ruthenium nitrosyl complex bearing a bipyridine-bis(alkoxide) ligand
Source: Royal Society of Chemistry journal article supplement (doi:10.1039/d1dt01918j), 2021-01-01
Supplement: d1dt01918j1.pdf [file d1dt01918j1.pdf]

## Electronic Supplementary Information

### Catalytic water oxidation by an *in-situ* generated ruthenium nitrosyl complex bearing a bipyridine-bis(alkoxide) ligand

Yingying Liu,<sup>\*a</sup> Siu-Mui Ng,<sup>b</sup> Shek-Man Yiu<sup>c</sup> and Tai-Chu Lau <sup>\*c</sup>

<sup>a</sup> Institute of Intelligent Machines, Hefei Institutes of Physical Science,  
Chinese Academy of Sciences, Hefei 230031, P. R. China.

Email: [yyliau@iim.ac.cn](mailto:yyliau@iim.ac.cn)

<sup>b</sup> Department of Food and Health Sciences,  
Technological and Higher Education Institute of Hong Kong (THEi),  
20A Tsing Yi Road, Tsing Yi Island, Hong Kong SAR, P. R. China.

<sup>c</sup> Department of Chemistry,  
City University of Hong Kong, Tat Chee Avenue, Kowloon Tong, Hong Kong SAR, P. R. China.

E-mail: [bhtclau@cityu.edu.hk](mailto:bhtclau@cityu.edu.hk)

| <b><i>Index</i></b>                                                       | <b><i>Page</i></b> |
|---------------------------------------------------------------------------|--------------------|
| Table S1                                                                  | 1                  |
| Table S2                                                                  | 2                  |
| Table S3                                                                  | 3                  |
| Fig. S1                                                                   | 4                  |
| Fig. S2                                                                   | 4                  |
| Fig. S3                                                                   | 5                  |
| Fig. S4                                                                   | 5                  |
| Fig. S5                                                                   | 6                  |
| Fig. S6                                                                   | 6                  |
| Fig. S7                                                                   | 7                  |
| Fig. S8                                                                   | 7                  |
| Fig. S9                                                                   | 8                  |
| Fig. S10                                                                  | 8                  |
| Fig. S11                                                                  | 9                  |
| Fig. S12                                                                  | 9                  |
| Fig. S13                                                                  | 10                 |
| Fig. S14                                                                  | 11                 |
| Fig. S15                                                                  | 11                 |
| Fig. S16                                                                  | 12                 |
| Fig. S17                                                                  | 12                 |
| XYZ coordinates of [Ru(Hbdalk)(NO)(pic) <sub>2</sub> (O)] <sup>2+</sup> . | 13-14              |

**Table S1** Selected bond lengths (Å) and angles (°) for **2**[Ce(NO<sub>3</sub>)<sub>6</sub>] and **3**[PF<sub>6</sub>]<sub>2</sub>.

| <b>2</b> [Ce(NO <sub>3</sub> ) <sub>6</sub> ] |         |           |         | <b>3</b> [PF <sub>6</sub> ] <sub>2</sub> |         |           |         |
|-----------------------------------------------|---------|-----------|---------|------------------------------------------|---------|-----------|---------|
| Ru1–O1                                        | 1.8983  | O1–Ru1–N4 | 96.825  | Ru1–O3                                   | 2.0096  | N1–Ru1–N4 | 92.321  |
| Ru1–O2                                        | 1.9049  | O1–Ru1–N2 | 148.663 | Ru1–N1                                   | 1.7635  | N1–Ru1–N5 | 90.757  |
| Ru1–N1                                        | 2.0160  | O1–Ru1–N3 | 80.846  | Ru1–N2                                   | 2.2049  | N2–Ru1–O3 | 157.867 |
| Ru1–N2                                        | 2.0120  | O2–Ru1–N1 | 149.411 | Ru1–N3                                   | 2.0096  | N2–Ru1–N3 | 78.066  |
| Ru1–N3                                        | 2.1018  | O2–Ru1–N2 | 77.806  | Ru1–N4                                   | 2.1003  | N2–Ru1–N4 | 91.359  |
| Ru1–N4                                        | 2.0972  | O2–Ru1–N3 | 97.178  | Ru1–N5                                   | 2.1080  | N2–Ru1–N5 | 91.572  |
|                                               |         | O2–Ru1–N4 | 80.530  | O1–N1                                    | 1.1419  | N3–Ru1–O3 | 79.866  |
|                                               |         | N1–Ru1–N2 | 76.481  | O2–H2                                    | 0.8402  | N3–Ru1–N4 | 88.565  |
|                                               |         | N1–Ru1–N3 | 96.925  |                                          |         | N3–Ru1–N5 | 87.835  |
|                                               |         | N1–Ru1–N4 | 87.473  |                                          |         | N4–Ru1–O3 | 86.394  |
|                                               |         | N2–Ru1–N3 | 85.252  | N1–Ru1–O3                                | 92.659  | N4–Ru1–N5 | 174.796 |
| O1–Ru1–O2                                     | 131.615 | N2–Ru1–N4 | 99.164  | N1–Ru1–N2                                | 109.441 | N5–Ru1–O3 | 89.274  |
| O1–Ru1–N1                                     | 77.499  | N3–Ru1–N4 | 174.417 | N1–Ru1–N3                                | 172.407 | Ru1–N1–O1 | 171.653 |

**Table S2.** Crystal data and structure refinement details for **2**[Ce(NO<sub>3</sub>)<sub>6</sub>]**·**3CH<sub>3</sub>CN and **3**[PF<sub>6</sub>]<sub>2</sub>**·**2H<sub>2</sub>O.

|                                             | <b>2</b> [Ce(NO <sub>3</sub> ) <sub>6</sub> ] <b>·</b> 3CH <sub>3</sub> CN<br>(CCDC No.: 2084830) | <b>3</b> [PF <sub>6</sub> ] <sub>2</sub> <b>·</b> 2H <sub>2</sub> O<br>(CCDC No.: 2084831)      |
|---------------------------------------------|---------------------------------------------------------------------------------------------------|-------------------------------------------------------------------------------------------------|
| Empirical formula                           | C <sub>34</sub> H <sub>41</sub> CeN <sub>13</sub> O <sub>20</sub> Ru                              | C <sub>28</sub> H <sub>37</sub> F <sub>12</sub> N <sub>5</sub> O <sub>5</sub> P <sub>2</sub> Ru |
| Formula weight                              | 1192.99                                                                                           | 914.63                                                                                          |
| Crystal system                              | triclinic                                                                                         | triclinic                                                                                       |
| Space group                                 | P -1                                                                                              | P -1                                                                                            |
| <i>a</i> /Å                                 | 11.4188(4)                                                                                        | 10.5197(4)                                                                                      |
| <i>b</i> /Å                                 | 12.6730(4)                                                                                        | 11.3197(5)                                                                                      |
| <i>c</i> /Å                                 | 16.9821(5)                                                                                        | 15.7798(6)                                                                                      |
| <i>α</i> /deg                               | 88.005(2)                                                                                         | 86.519(3)                                                                                       |
| <i>β</i> /deg                               | 89.737(3)                                                                                         | 80.554(3)                                                                                       |
| <i>γ</i> /deg                               | 71.800(3)                                                                                         | 74.566(3)                                                                                       |
| Volume/Å <sup>3</sup>                       | 2333.08(13)                                                                                       | 1786.44(12)                                                                                     |
| <i>Z</i>                                    | 2                                                                                                 | 2                                                                                               |
| <i>D</i> <sub>calc</sub> /gcm <sup>-3</sup> | 1.698                                                                                             | 1.700                                                                                           |
| <i>μ</i> (Mo-Kα)/mm <sup>-1</sup>           | 10.854                                                                                            | 5.392                                                                                           |
| <i>F</i> (000)                              | 1196.0                                                                                            | 924.0                                                                                           |
| Temperature/K                               | 173(2)                                                                                            | 173(2)                                                                                          |
| <i>λ</i> /Å                                 | 1.54178                                                                                           | 1.54178                                                                                         |
| <i>θ</i> min, max/deg                       | 3.674 / 68.225                                                                                    | 4.052 / 68.242                                                                                  |
| Total, unique data                          | 8489, 8246                                                                                        | 6460, 6135                                                                                      |
| R1(obsd/all) <sup>[a]</sup>                 | 0.0378 / 0.0387                                                                                   | 0.0738 / 0.0761                                                                                 |
| wR2(obsd/all) <sup>[b]</sup>                | 0.1041 / 0.1051                                                                                   | 0.1901 / 0.1915                                                                                 |
| Goodness-of-fit on <i>F</i> <sup>2</sup>    | 1.075                                                                                             | 1.150                                                                                           |

[a]  $R = \sum ||F_o| - |F_c|| / \sum |F_o|$ . [b]  $R_w = [\sum \omega (|F_o| - |F_c|)^2 / \sum \omega F_o]^1/2$ .

**Table S3.** Relative abundance of  $^{16}\text{O}=^{16}\text{O}$ ,  $^{16}\text{O}=^{18}\text{O}$ , and  $^{18}\text{O}=^{18}\text{O}$  generated during the oxidation of  $\text{H}_2^{18}\text{O}$ -labeled water by **1** and **3**.<sup>a</sup>

|                                                             |                               | relative abundance    |                          |
|-------------------------------------------------------------|-------------------------------|-----------------------|--------------------------|
|                                                             |                               | observed <sup>b</sup> | theoretical <sup>c</sup> |
| <b>1</b><br>O <sub>2</sub> : 8.35 μmol<br>TON = 2.4 (0.5 h) | $^{16}\text{O}=^{16}\text{O}$ | 0.0025±0.0010         | 0.0004                   |
|                                                             | $^{16}\text{O}=^{18}\text{O}$ | 0.0372±0.0021         | 0.0392                   |
|                                                             | $^{18}\text{O}=^{18}\text{O}$ | 0.9603±0.0031         | 0.9604                   |
| <b>3</b><br>O <sub>2</sub> : 8.28 μmol<br>TON = 2.4 (3 h)   | $^{16}\text{O}=^{16}\text{O}$ | 0.0036±0.0036         | 0.0004                   |
|                                                             | $^{16}\text{O}=^{18}\text{O}$ | 0.0348±0.0014         | 0.0392                   |
|                                                             | $^{18}\text{O}=^{18}\text{O}$ | 0.9616±0.0037         | 0.9604                   |

<sup>a</sup> [Ru] = 3.5 mM, [Ce(IV)] = 70 mM, in 98%  $\text{H}_2^{18}\text{O}$ . <sup>b</sup> Relative ratios of dioxygen signals; standard deviations of no less than three trials are indicated in parentheses. <sup>c</sup> Probability of 98%  $^{18}\text{OH}_2$ -labeled water producing  $^{36}\text{O}_2$ ,  $^{34}\text{O}_2$ , and  $^{32}\text{O}_2$  is 0.9604, 0.0392, and 0.0004, respectively; values in table account for dilution factors; theoretical values assume both O-atoms of dioxygen are derived from water).

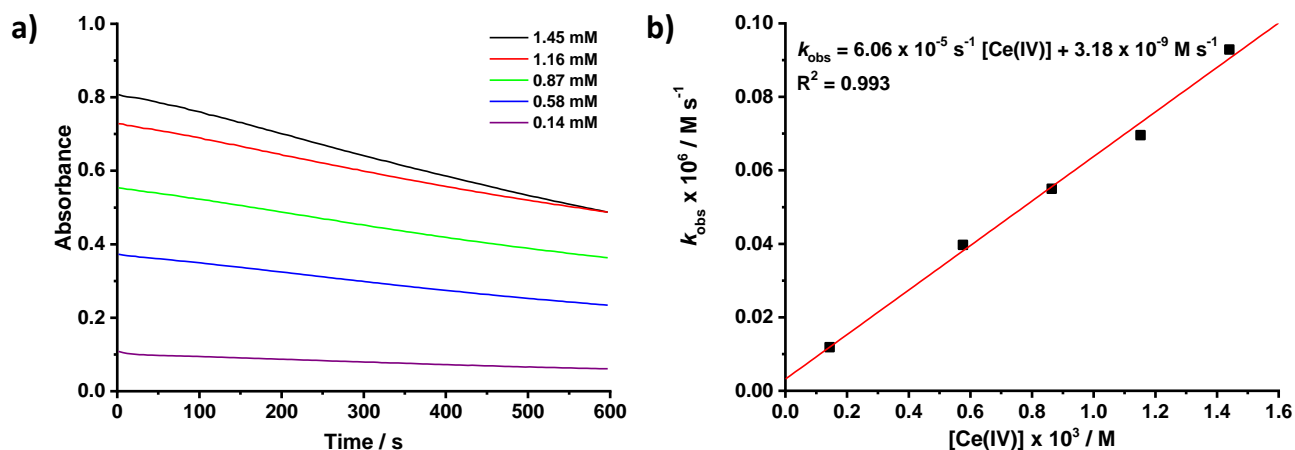

**Fig. S1** a) Decay of Ce(IV) monitored at 360 nm after addition of **1** (10.3 μM) with various concentrations of Ce(IV) in 0.1 M HNO<sub>3</sub> at 20.0 °C; b) Plot of  $k_{\text{obs}}$  vs  $[\text{Ce(IV)}]$ . Zeroth-order rate constants were evaluated from the slope at 1 to 300 s.

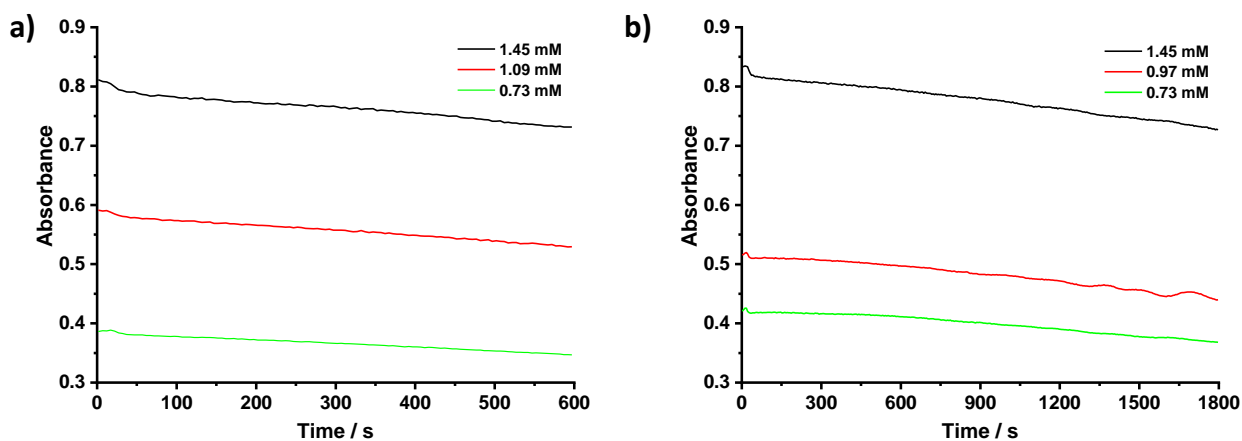

**Fig. S2** Decay of Ce(IV) monitored at 360 nm after addition of a) **1** (1.0 μM) and b) **3** (1.0 μM) with various concentrations of Ce(IV) in 0.1 M HNO<sub>3</sub> at 20.0 °C

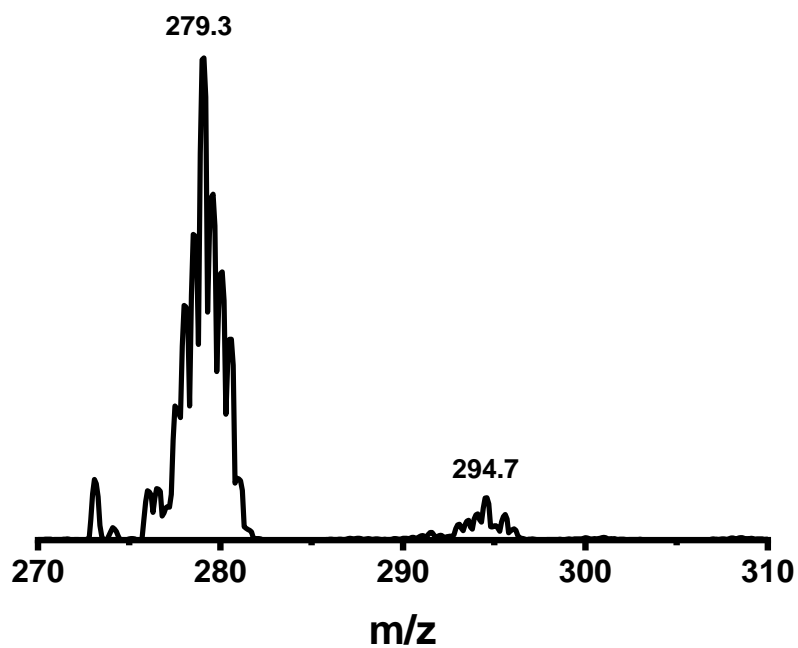

**Fig. S3** ESI/MS of **1** (0.25 mM) in H<sub>2</sub>O/CH<sub>3</sub>CN (3:1 v:v) recorded immediately after the addition of 15 equiv. of Ce(IV).

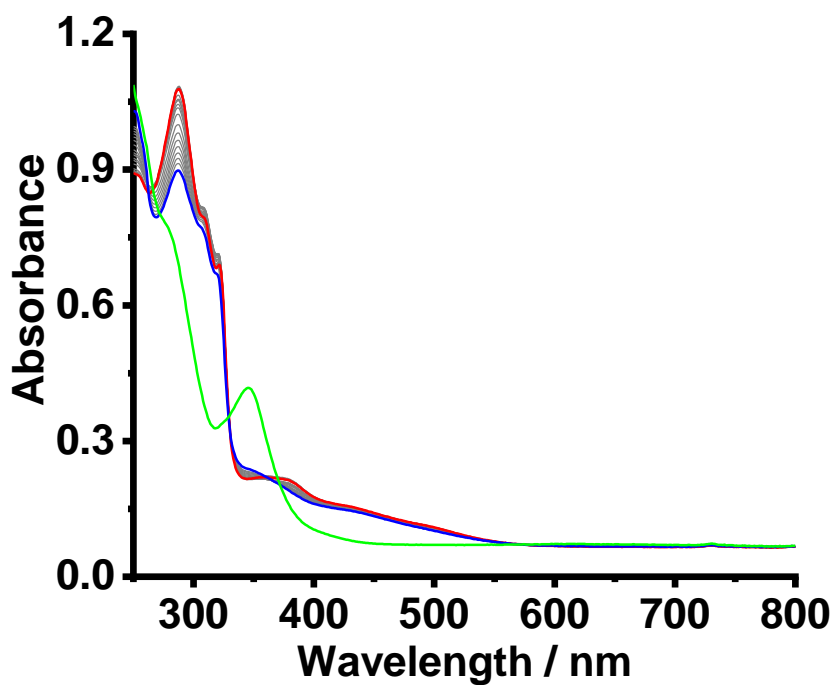

**Fig. S4** UV/vis spectra changes of **1** ( $5.01 \times 10^{-5}$  M) in 0.1 M HNO<sub>3</sub> (5% CH<sub>3</sub>CN): recorded immediately after mixing with HNO<sub>3</sub> (red); recorded after 24 h (blue). UV/vis spectrum of **3** (green) ( $5.00 \times 10^{-5}$  M) in 0.1 M HNO<sub>3</sub> (5% CH<sub>3</sub>CN).

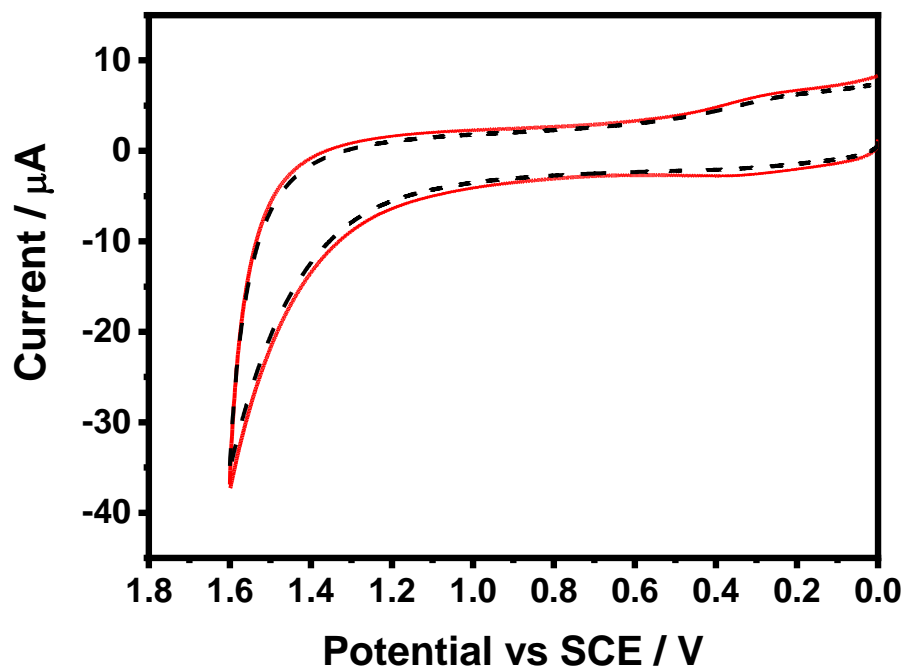

**Fig. S5** CV of **3** (0.5 mM, solid) and blank (dash) in 0.1 M HNO<sub>3</sub>/CH<sub>3</sub>CN (3:1 v:v) at 20 °C. Scan rate = 100 mV s<sup>-1</sup>.

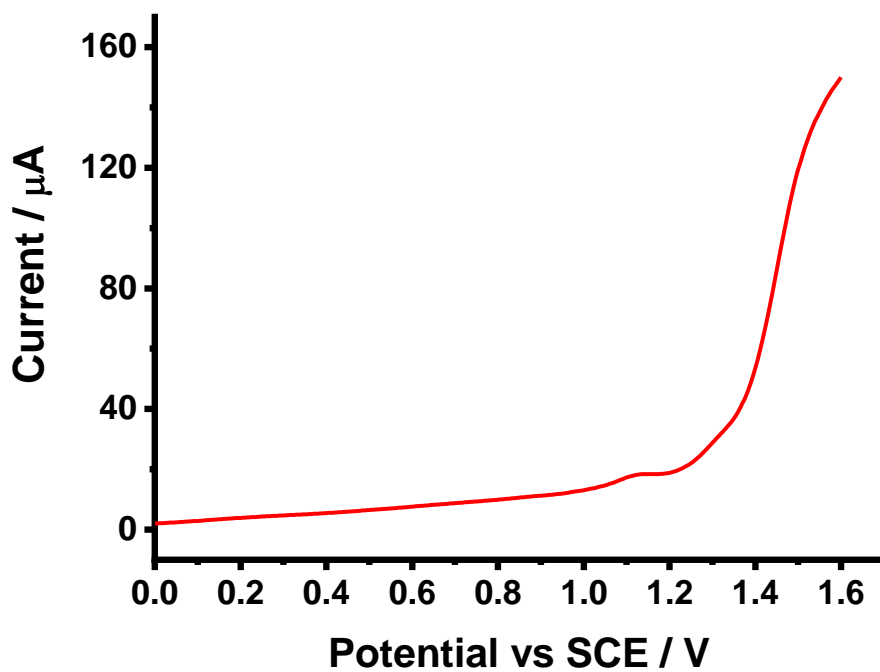

**Fig. S6** Differential pulse voltammetry of **3** (0.2 mM) at pH 1 (0.1 M HNO<sub>3</sub>) at r.t..



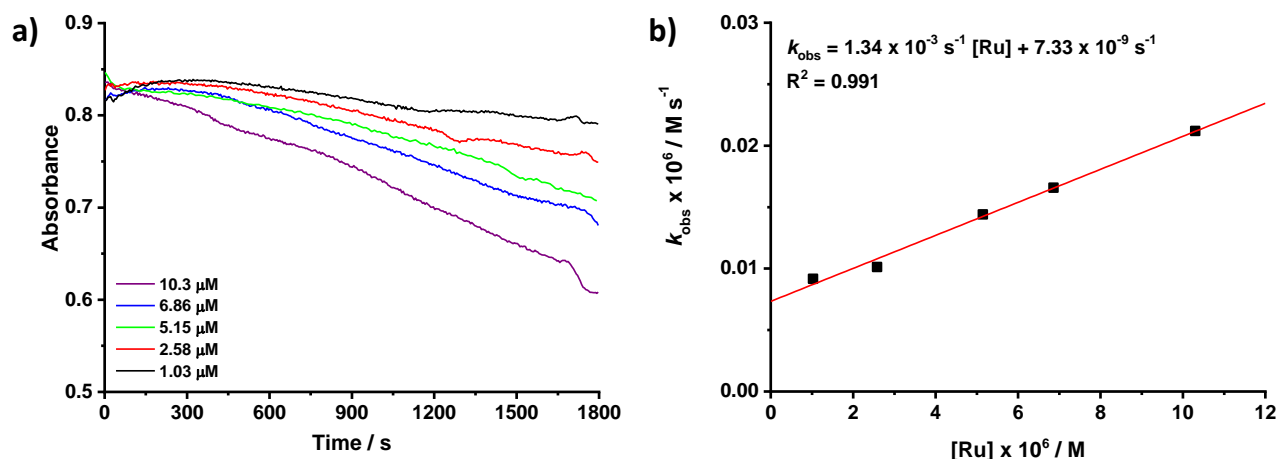

**Fig. S7** a) Absorbance changes at 360 nm vs time for the reaction of various concentrations of **3** with Ce(IV) (1.44 mM) in 0.1 M HNO<sub>3</sub> at 20.0 °C; b) Plot of  $k_{\text{obs}}$  vs  $[\text{3}]$ . Zeroth-order rate constants were evaluated from 400 to 900 s, after the induction period.

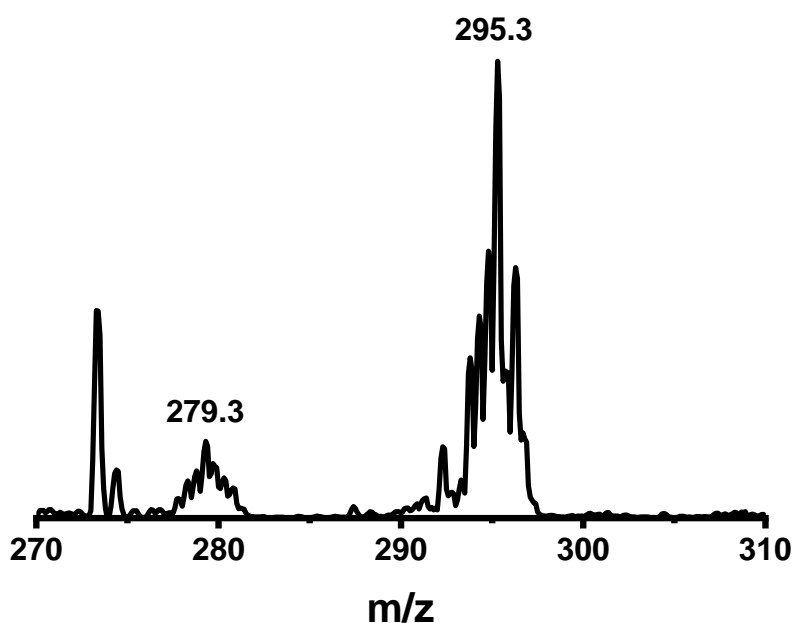

**Fig. S8** ESI/MS of <sup>15</sup>N-**3** (0.50 mM) in H<sub>2</sub>O/CH<sub>3</sub>CN (4:1 v:v) recorded 60 min after the addition of 100 equiv. of Ce(IV). The solution was diluted 2 times by CH<sub>3</sub>CN before injection. Notably, a small peak due to **1** ( $m/z = 279.3$ ) (probably formed during the electrospraying process which is also observed in ESI/MS of neat <sup>14</sup>N-**3**) is recorded in MS before <sup>15</sup>N-**3** was treated with Ce(IV). After treatment with Ce(IV), the peak intensities ratios of **1** and **3** are unchanged.

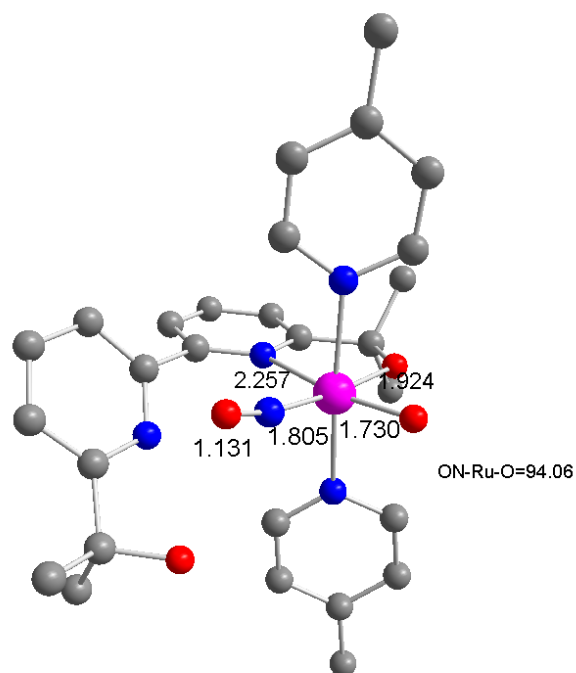

**Fig. S9** Ball-and-stick representation of the optimized structures at the B3LYP level of theory for  $[\text{Ru}(\text{Hbdalk})(\text{NO})(\text{pic})_2(\text{O})]^{2+}$ . Color code: Ru, cyan; C, gray; N, blue; O, red; H atoms of the ligands were omitted for clarity.

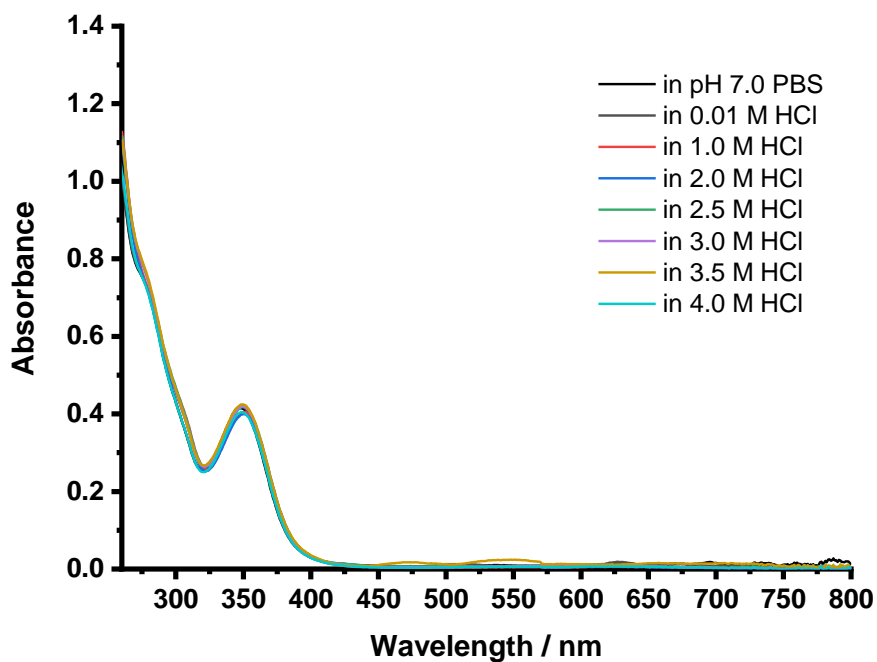

**Fig. S10** UV/vis spectra of **3** ( $1.01 \times 10^{-4}$  M) at pH 7.0 buffer and in the presence of various concentrations of HCl.

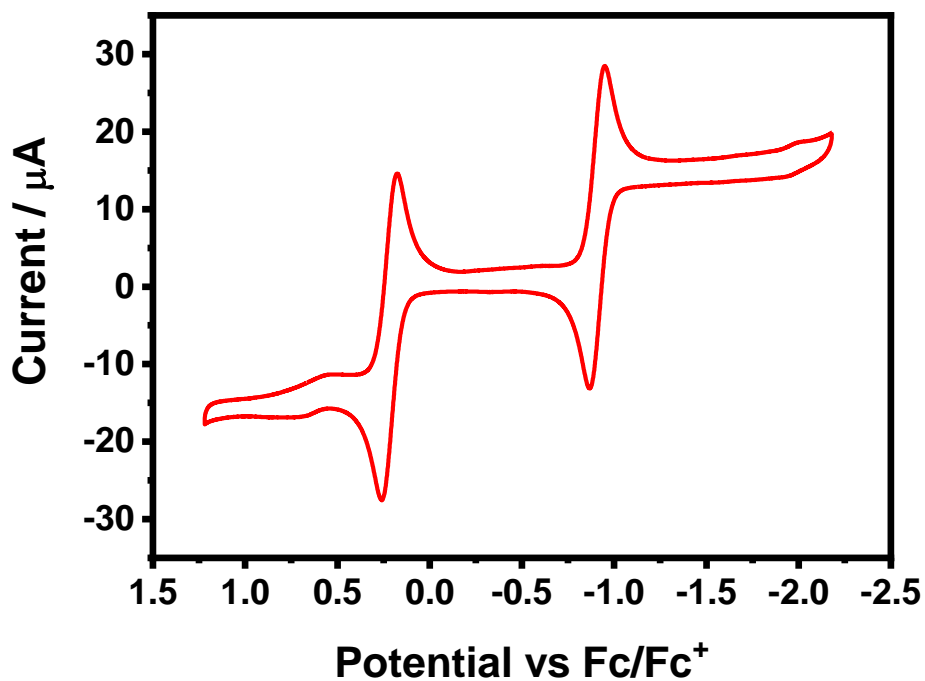

**Fig. S11** CV of **1** (0.5 mM) in CH<sub>3</sub>CN (0.1 M <sup>n</sup>Bu<sub>4</sub>PF<sub>6</sub>) at r.t.. Scan rate = 100 mV s<sup>-1</sup>.

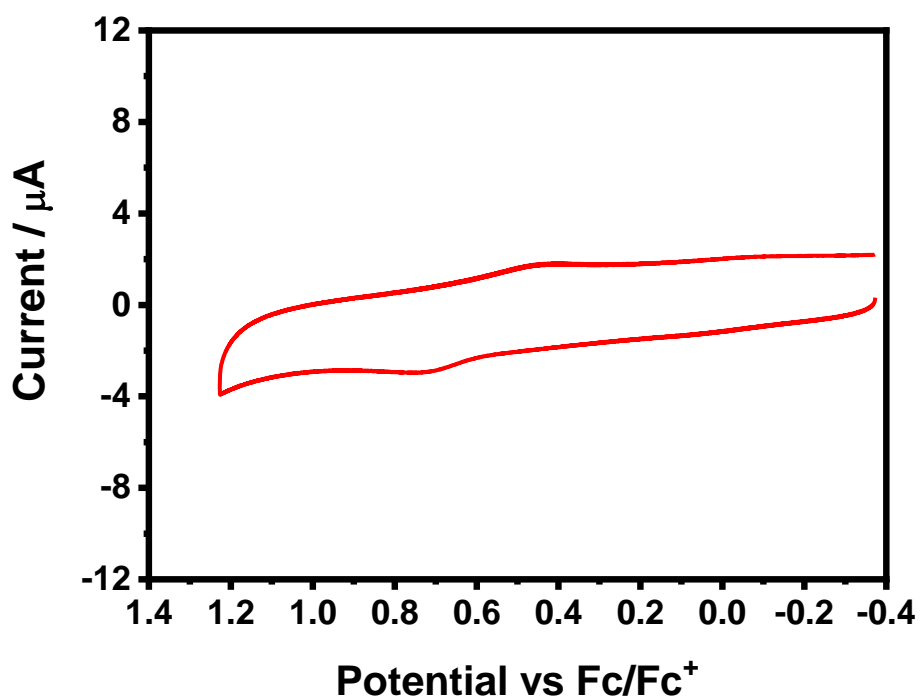

**Fig. S12** CV of **3** (0.5 mM) in CH<sub>3</sub>CN (0.1 M <sup>n</sup>Bu<sub>4</sub>PF<sub>6</sub>) at r.t.. Scan rate = 100 mV s<sup>-1</sup>.

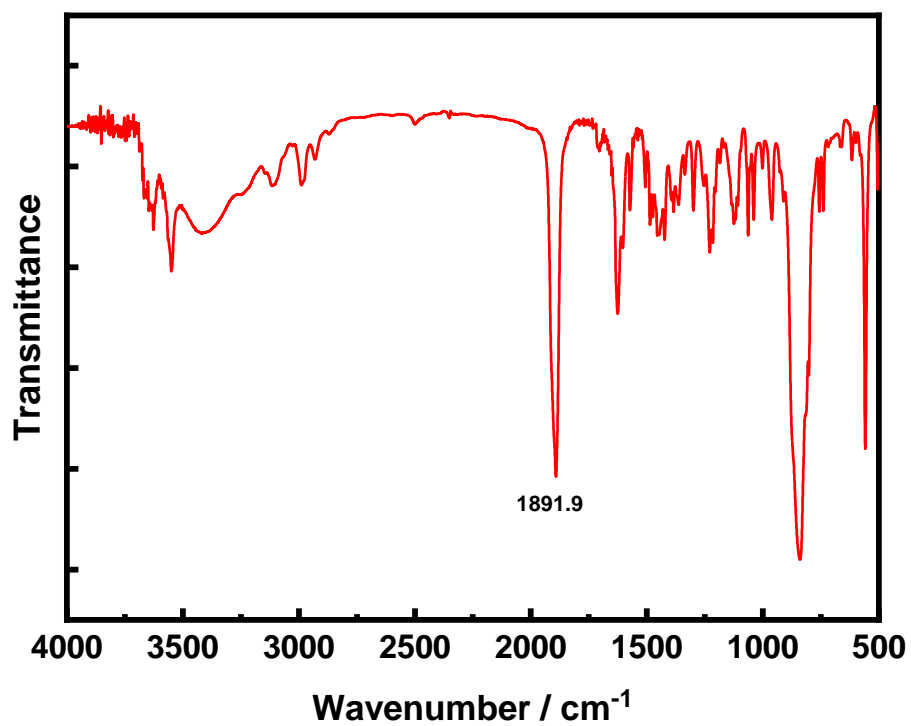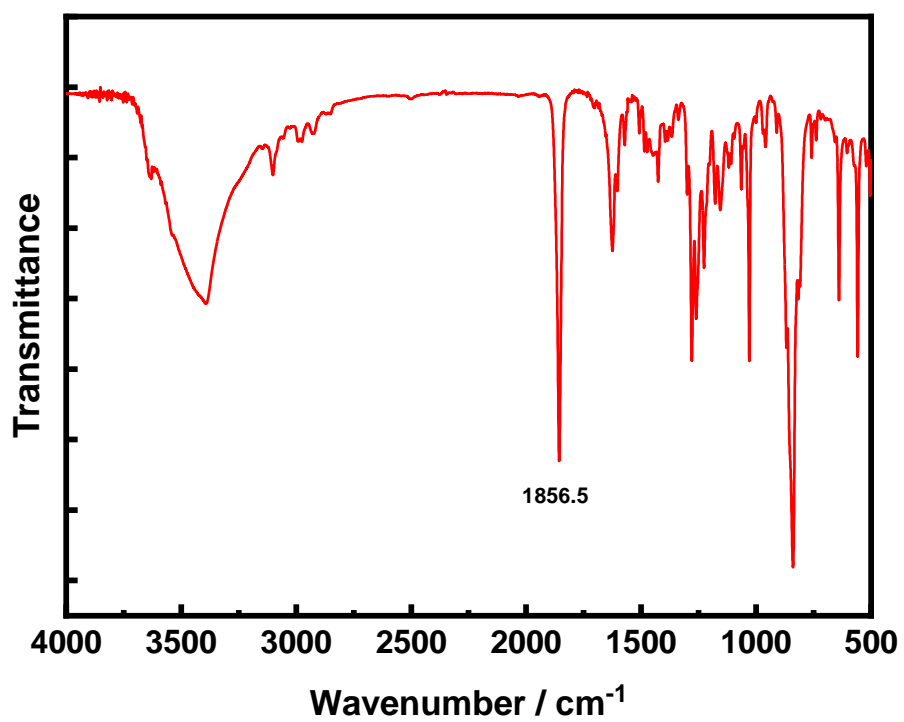

**Fig. S13** IR spectra of  $^{14}\text{N-3}[\text{PF}_6]_2$  (top) and  $^{15}\text{N-3}[\text{PF}_6]_2$  (bottom).

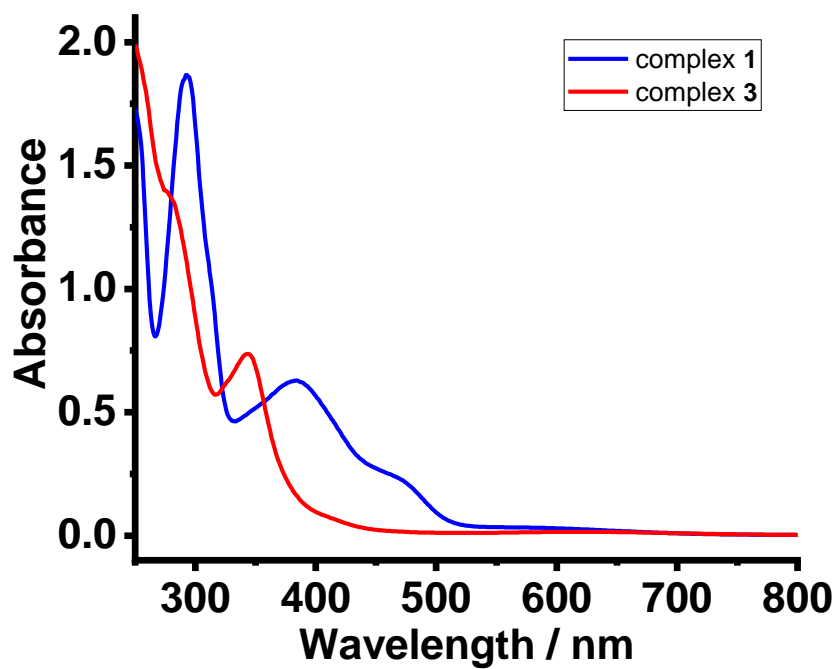

Fig. S14 UV/vis spectra of 1 (blue) and 3 (red) in CH<sub>3</sub>CN ( $1.01 \times 10^{-4}$  M).

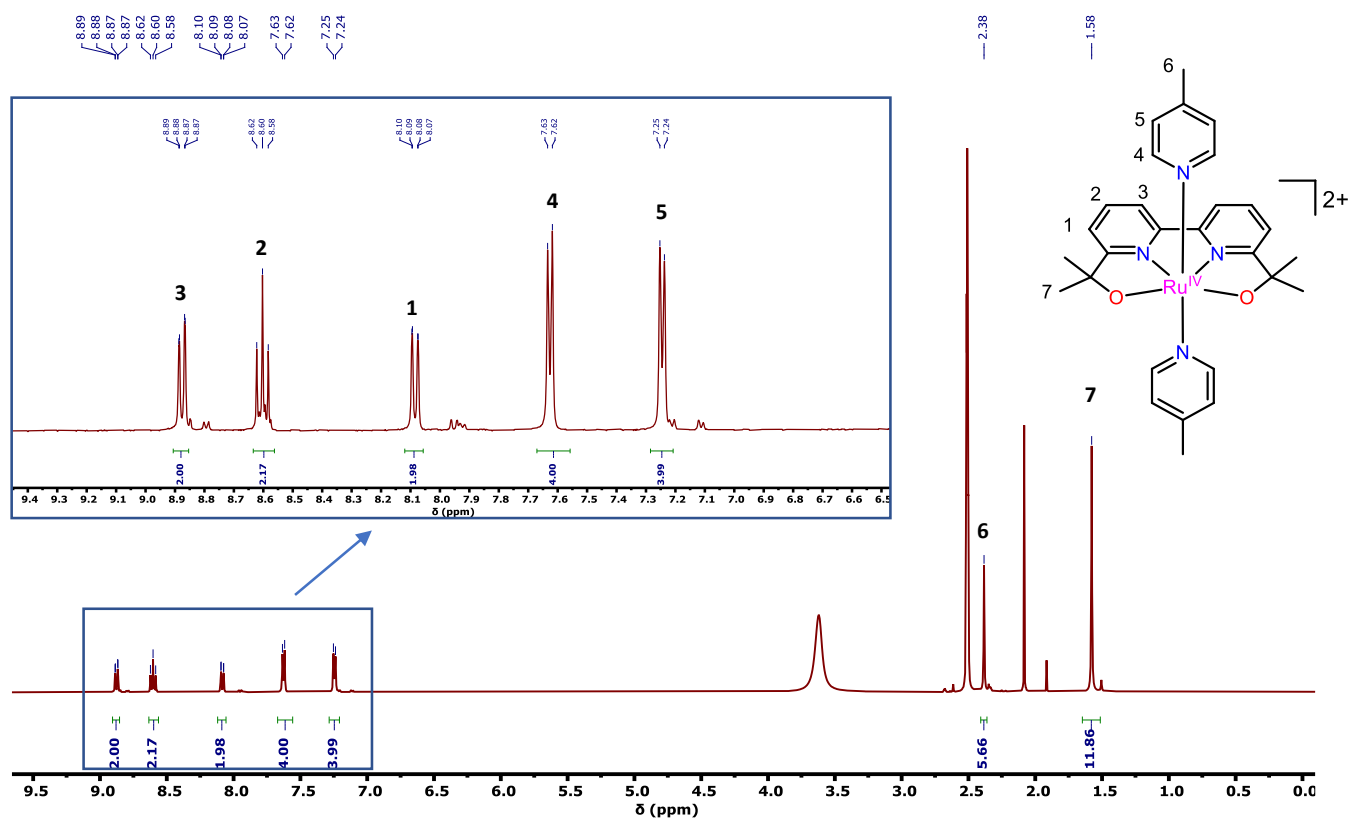

Fig. S15 <sup>1</sup>H NMR of 2[Ce(NO<sub>3</sub>)<sub>6</sub>] in DMSO-d<sub>6</sub>.

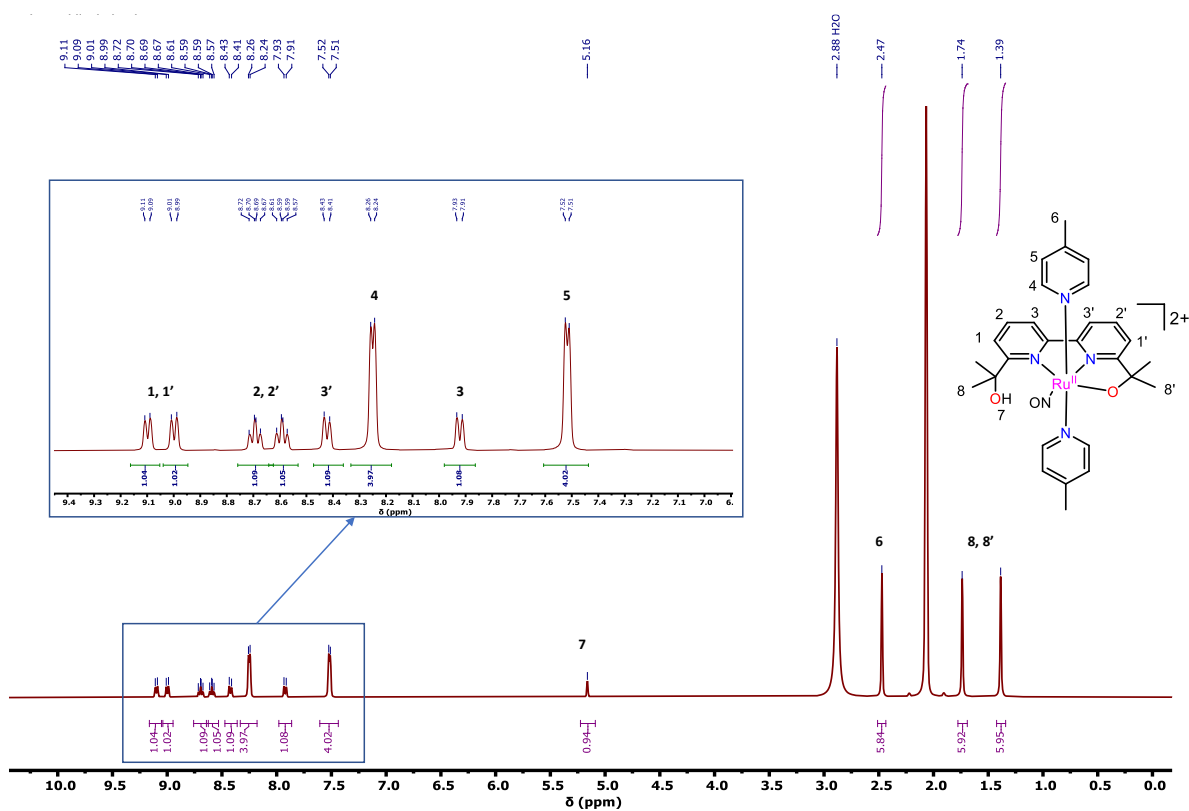

**Fig. S16**  $^1\text{H}$  NMR of  $3[\text{PF}_6]_2$  in acetone- $d_6$ .

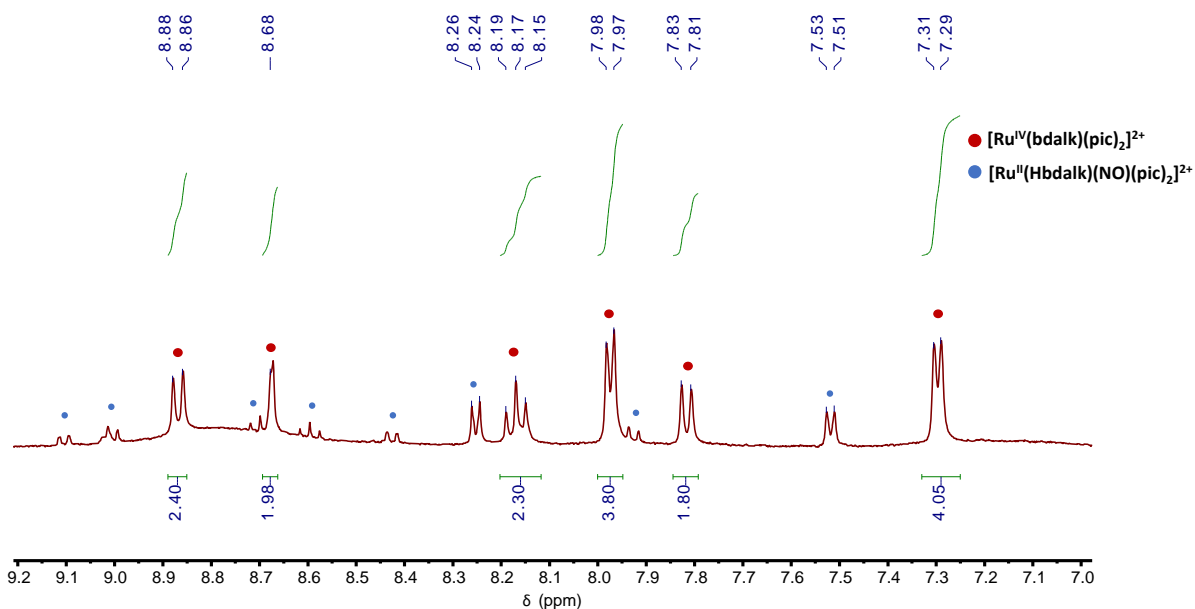

**Fig. S17**  $^1\text{H}$  NMR (in acetone- $d_6$ ) of dark purple solid isolated from reaction of complex **1** + 1 equiv. of Ce(IV) in 0.01 M  $\text{HNO}_3/\text{CH}_3\text{CN}$  (2:1 v:v) followed by addition of excess  $\text{NH}_4\text{PF}_6$  to the reaction solution. ESI/MS of obtained solid is consistent with  $[\text{Ru}^{\text{IV}}(\text{dalk})(\text{pic})_2](\text{PF}_6)_2$  species, with minor Ru-NO impurities.

XYZ coordinates of [Ru(Hbdalk)(NO)(pic)<sub>2</sub>(O)]<sup>2+</sup>.

---

|    |                   |                   |                  |
|----|-------------------|-------------------|------------------|
| Ru | 9.63976422458142  | 8.73604037616855  | 2.97013105128085 |
| O  | 10.16113738722592 | 6.89068769185316  | 2.81188735025332 |
| O  | 8.89964212279449  | 8.56819088505184  | 1.41547444511840 |
| N  | 10.83625669641968 | 11.44202668779479 | 5.04934999318907 |
| N  | 10.71179319898207 | 8.38898634374161  | 4.92583421320865 |
| N  | 11.50029141857745 | 9.20514964455239  | 2.04935824195177 |
| N  | 7.85260450359200  | 7.98507355135522  | 3.93268307326027 |
| O  | 10.85132799311720 | 12.77466178799067 | 2.74834832458442 |
| C  | 11.04247370361136 | 13.60137869826404 | 3.90688602477182 |
| C  | 10.93153949447429 | 6.20667406555681  | 3.77796399792234 |
| C  | 10.54901028241721 | 12.75175959489175 | 5.08894156508577 |
| C  | 10.44935563437797 | 10.63530271548759 | 6.04309366977024 |
| C  | 10.90613984010226 | 9.20796872126217  | 6.00865481099418 |
| C  | 11.18350850895989 | 7.11289267844403  | 4.97393958396784 |
| C  | 12.37220056381603 | 10.10304239984023 | 2.55112978663395 |
| C  | 11.80453962530719 | 8.53987492324455  | 0.90738123592834 |
| C  | 7.31176192740479  | 8.52935858091842  | 5.04297741944477 |
| C  | 7.22357830072336  | 6.94434993170118  | 3.34007437530908 |
| C  | 9.85525004895948  | 13.30503968102128 | 6.17794893461306 |
| C  | 9.43651324496467  | 12.47064414177780 | 7.21474990270148 |
| C  | 9.73234370368357  | 11.10783156782780 | 7.15525262572986 |
| C  | 11.57600299885745 | 8.74561349064903  | 7.14403414127455 |
| C  | 12.07237444414957 | 7.44164398574952  | 7.18884905234775 |
| C  | 11.87442129299028 | 6.62157524846004  | 6.08795915347160 |
| C  | 12.53984367935852 | 13.90679521680641 | 4.09861485990618 |
| C  | 10.24055046791741 | 14.89797944407323 | 3.73564182912382 |
| C  | 12.27320272292440 | 5.79264843301369  | 3.12677305802948 |
| C  | 10.14233083524627 | 4.94706036868759  | 4.20133126974320 |
| C  | 13.59079477161220 | 10.35084265718636 | 1.92500218266741 |
| C  | 13.93800630679229 | 9.68466631339493  | 0.74039781240961 |
| C  | 12.99491734231292 | 8.76318361665952  | 0.23683682114768 |
| C  | 15.23016774022156 | 9.94168250366432  | 0.02535503016108 |
| C  | 6.12748063729340  | 8.05661766565979  | 5.59354718676597 |
| C  | 5.44463819745682  | 6.98382547779052  | 4.99312069997115 |
| C  | 6.03387821112547  | 6.43340773658721  | 3.83785836261312 |
| C  | 4.15553841481899  | 6.45045832224473  | 5.54039840835021 |
| N  | 9.01593368170161  | 10.41039817824859 | 3.22858950804229 |
| H  | 11.09235423413371 | 13.29919674399824 | 1.97115646441100 |
| H  | 11.06904987370280 | 7.82106058917437  | 0.54411662267580 |
| H  | 7.84251897980004  | 9.36426249679124  | 5.50509635581508 |
| H  | 7.69827680681991  | 6.52714873659821  | 2.45060672745081 |
| H  | 9.63615761684456  | 14.37173055770391 | 6.21752599367013 |

---

---

|   |                   |                   |                   |
|---|-------------------|-------------------|-------------------|
| H | 8.88299197227077  | 12.88038145606404 | 8.06331205012683  |
| H | 9.41696968785494  | 10.43116419202640 | 7.95218442770578  |
| H | 11.73512597075218 | 9.42667433411476  | 7.98073673668038  |
| H | 12.60959673827849 | 7.07993749946813  | 8.06911042799671  |
| H | 12.24524948655736 | 5.59635750043010  | 6.08433511742664  |
| H | 12.92470124547156 | 14.46718821451690 | 3.23080743678947  |
| H | 13.11713874981229 | 12.97588738144747 | 4.20063309418443  |
| H | 12.71402979546227 | 14.52068990716668 | 4.99547994332415  |
| H | 10.57420310660842 | 15.41465345319844 | 2.82124238862217  |
| H | 10.39624635546142 | 15.60189578464996 | 4.56621611905450  |
| H | 9.16396481480806  | 14.69306870530386 | 3.63702687216416  |
| H | 12.05787813615120 | 5.21295102645288  | 2.21753477859679  |
| H | 12.86766499906788 | 5.16163050829803  | 3.80365837329122  |
| H | 12.87354587125628 | 6.67173758180350  | 2.85319397059503  |
| H | 9.90377858896422  | 4.36500451555095  | 3.29935790695090  |
| H | 9.20352110560499  | 5.21637486638713  | 4.70678181942152  |
| H | 10.72973235032417 | 4.30649476581065  | 4.87500482227286  |
| H | 14.26841010094714 | 11.08073750190000 | 2.37296504662458  |
| H | 13.18593341238088 | 8.21621076540902  | -0.68954160172705 |
| H | 15.73355404162053 | 8.99594451454834  | -0.23165203013701 |
| H | 15.91684052323829 | 10.55773632834454 | 0.62167480193918  |
| H | 15.03824843429670 | 10.46606246777906 | -0.92710421203844 |
| H | 5.73456587289877  | 8.53484380559368  | 6.49328814230926  |
| H | 5.55913714472858  | 5.60257248925138  | 3.31025388279218  |
| H | 4.25465243491482  | 5.38051312690874  | 5.78916761344505  |
| H | 3.35667709897012  | 6.52553780571429  | 4.78362284260683  |
| H | 3.83322420071728  | 6.98957386973059  | 6.44121086864533  |
| H | 12.06574396934941 | 10.63146835290266 | 3.45835060841274  |
| O | 8.45994211105844  | 11.36673482734027 | 3.46330558615653  |

---
